# Supplementary material
Source: PubMed Central journal article supplement (PMC9884178)
Supplement: NIHMS1849544-supplement-Supplementary_Material.pdf [file NIHMS1849544-supplement-Supplementary_Material.pdf]

---

**Supplementary information**

---

**Structural basis of lipopolysaccharide maturation by the O-antigen ligase**

---

In the format provided by the  
authors and unedited

Structural basis of Lipopolysaccharide Maturation by O-Antigen Ligase WaaL

Khuram U. Ashraf<sup>1</sup>, Rie Nygaard<sup>1</sup>, Owen N. Vickery<sup>2,3,#</sup>, Satchal K. Erramilli<sup>4,#</sup>, Carmen M. Herrera<sup>5,#</sup>, Thomas H. McConville<sup>6,#</sup>, Vasileios I. Petrou<sup>7,8</sup>, Sabrina I. Giacometti<sup>1</sup>, Meagan Belcher Dufrisne<sup>1</sup>, Kamil Nosol<sup>4</sup>, Allen P. Zinkle<sup>1</sup>, Chris L.B. Graham<sup>2</sup>, Michael Loukeris<sup>9</sup>, Brian Kloss<sup>9</sup>, Karolina Skorupinska-Tudek<sup>10</sup>, Ewa Swiezewska<sup>10</sup>, David I. Roper<sup>2,1</sup>, Oliver B. Clarke<sup>1,11</sup>, Anne-Catrin Uhlemann<sup>6</sup>, Anthony A. Kossiakoff<sup>4</sup>, M. Stephen Trent<sup>5\*</sup>, Phillip J. Stansfeld<sup>2,3\*</sup> and Filippo Mancia<sup>1\*</sup>

<sup>1</sup>Department of Physiology and Cellular Biophysics, Columbia University Irving Medical Center, New York, NY 10032, USA.

<sup>2</sup>School of Life Sciences, University of Warwick, Coventry, CV4 7AL, UK.

<sup>3</sup>Department of Chemistry, University of Warwick, Coventry, CV4 7AL, UK.

<sup>4</sup>Department of Biochemistry and Molecular Biology, University of Chicago, Chicago, IL, 60637, USA.

<sup>5</sup>Department of Infectious Diseases, College of Veterinary Medicine, University of Georgia, Athens, GA, 30602, USA.

<sup>6</sup>Department of Medicine, Division of Infectious Diseases, Columbia University Medical Center, New York, New York, 10032, USA.

<sup>7</sup>Department of Microbiology, Biochemistry, and Molecular Genetics, New Jersey Medical School, Rutgers Biomedical Health Sciences, Newark, NJ, 07103, USA.

<sup>8</sup>Center for Immunity and Inflammation, New Jersey Medical School, Rutgers Biomedical Health Sciences, Newark, NJ, 07103, USA.

<sup>9</sup>New York Consortium on Membrane Protein Structure, New York Structural Biology Center, 89 Convent Avenue, New York, NY, 10027, USA.

<sup>10</sup>Institute of Biochemistry and Biophysics, Polish Academy of Sciences, 02-106 Warsaw, Poland.

<sup>11</sup>Department of Anesthesiology, Columbia University Irving Medical Center, New York, NY, 10032, USA.

#These authors contributed equally.

\*Correspondence to be addressed to: strent@uga.edu (M.S.T.),

Phillip.Stansfeld@warwick.ac.uk (P.J.S.), fm123@cumc.columbia.edu (F.M.)

## **Table of Content:**

**\*Red, dashed, boxes indicate how gels where cropped.**

**SI Figure 1 | Uncropped LPS assay gels from Main Figures. a,** LPS assay gel from [Fig. 2c](#) showing analysis of *CmWaaL* ligase activity in whole cells. LPS gel showing O-antigen extension in *C. metallidurans* expressing *CmWaaL* variants. With and empty plasmid as a control. **b,** Functional analysis gel from [Fig. 4c](#) of *EcWaaL* ligase variants in whole cells by LPS gel analysis. WaaL proteins were expressed from plasmid pWSK29 in the W3110  $\Delta$ waaL strain. With and empty plasmid as a control.

**SI Figure 2 | Uncropped LPS assay gels from Extended Data Figures. a,** LPS assay gel from [Extended Data Fig. 1c](#) showing functional analysis of *CmWaaL* ligase activity in whole cells, showing O-antigen ligase activity is abolished when the gene encoding WaaL is deleted and activity is restored by plasmid complementation. **b,** Functional analysis of *EcWaaL* ligase activity from [Extended Data Fig. 7a](#) carried out in whole cells by LPS gel analysis. W3110  $\Delta$ waaL containing either empty vector pWSK29 ( $\emptyset$ ), pWSK29::*EcWaaL* (WT) as controls and pWSK19::*EcWaaL*- mutant variants to test for O-antigen ligase activity. **c,** Functional analysis gel from [Extended Data Fig. 7e](#) showing *CmWaaL* ligase activity in whole cells. *C. metallidurans*  $\Delta$ waaL containing either empty vector pBBR1( $\emptyset$ ), pBBR1::*CmWaaL* (WT) as controls for evaluating *CmWaaL*-variants for O-antigen extension.

**SI Figure 3 | Uncropped SDS-page gels from Extended Data Figures. a,** SDS-PAGE gel from [Extended Data Fig. 1e](#) depicting *CmWaaL* purified in detergent, *CmWaaL* reconstituted into nanodiscs (MSP1E3D1 and POPG), and *CmWaaL* reconstituted into nanodiscs (MSP1E3D1 and POPG) with Fab (WaB10) bound. Molecular weight markers can also be observed and are labelled. **b,** SDS-PAGE gels from [Extended Data Fig. 7c](#) of all *EcWaaL* mutants used for LPS ligase analysis, that were purified to verify expression.

**SI Figure 4 | Uncropped TLC and Western Blot analysis from Extended Data Figures. a,** TLC analysis from Extended Data Fig. 5d of detergent purified CmWaaL along with suitable controls: POPG, Und-P, Und-PP and an unrelated control protein expressed in *E. coli* were run in separate lanes. **b,** Western blot analysis, from Extended Data Fig. 7d, using a mouse monoclonal anti-Flag antibody, of Flag purified WT *CmWaaL* and mutants, grown in *C. metallidurans*, for testing in the O-antigen ligase assay. Red markers indicate molecular weight markers.

**Supplementary Table 1 | Raw Single-point ELISA and Multi-point sAB ELISA data**

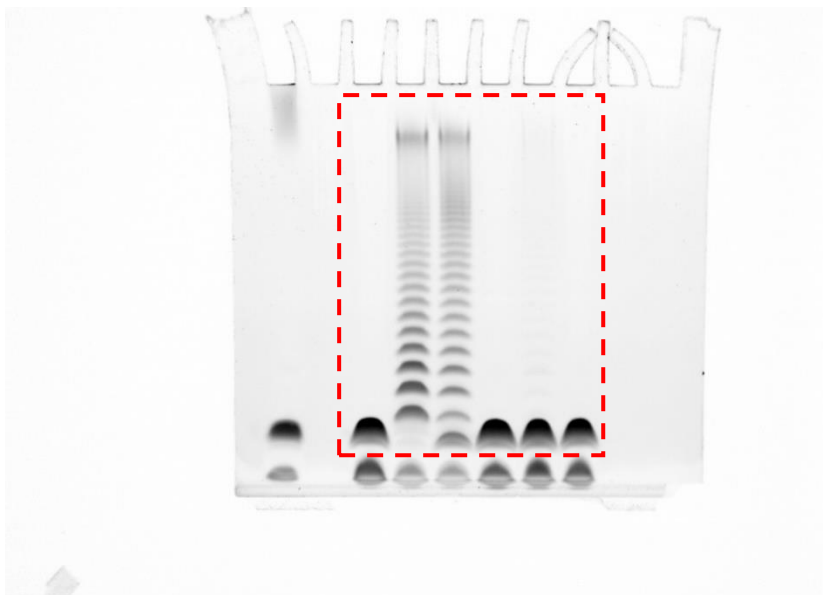

**Supplementary Figure 1a | Uncropped gel from Figure 2c.**

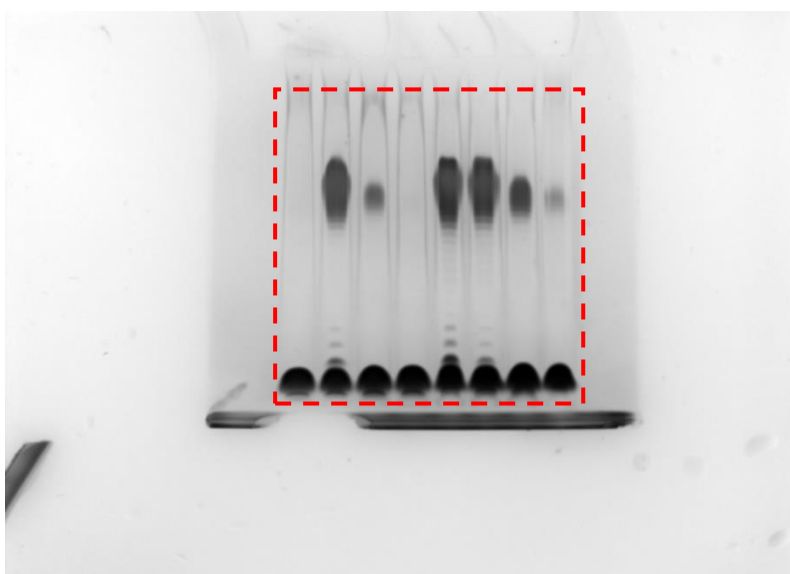

**Supplementary Figure 1b | Uncropped gel from Figure 4c.**

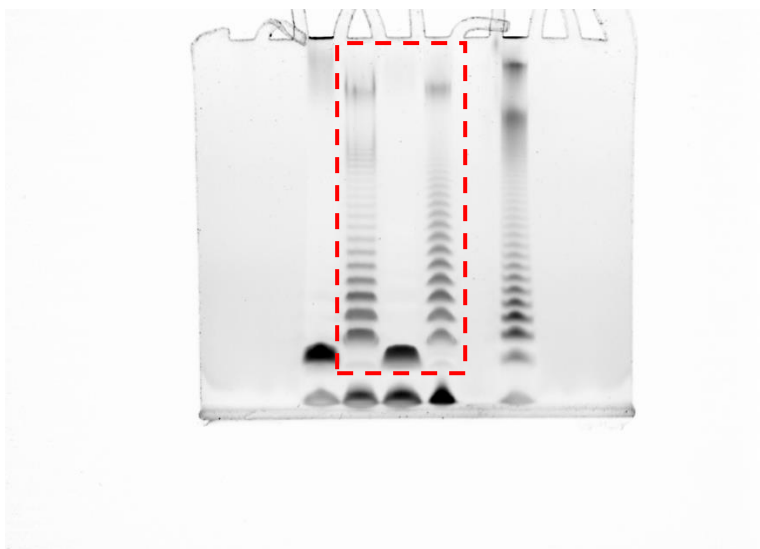

**Supplementary Figure 2a | Uncropped gel from Extended Data Fig. 1c**

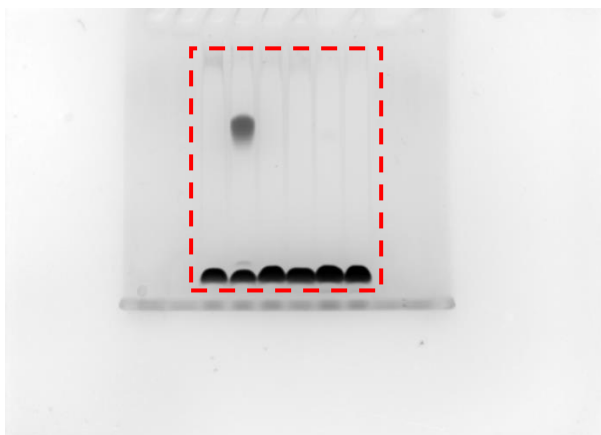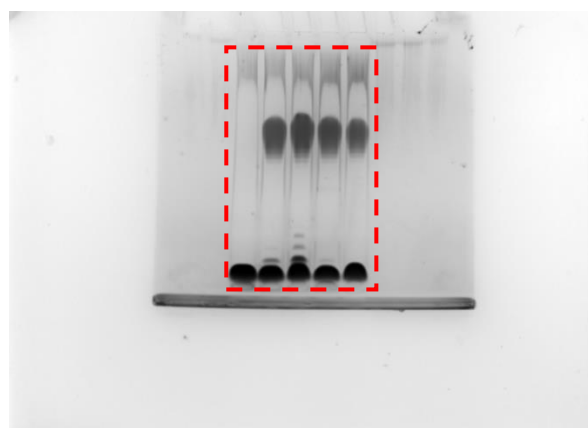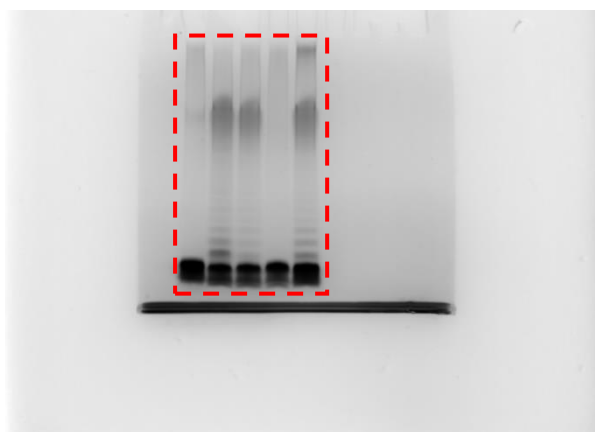

**Supplementary Figure 2b | Uncropped gels from Extended Data Fig. 7a**

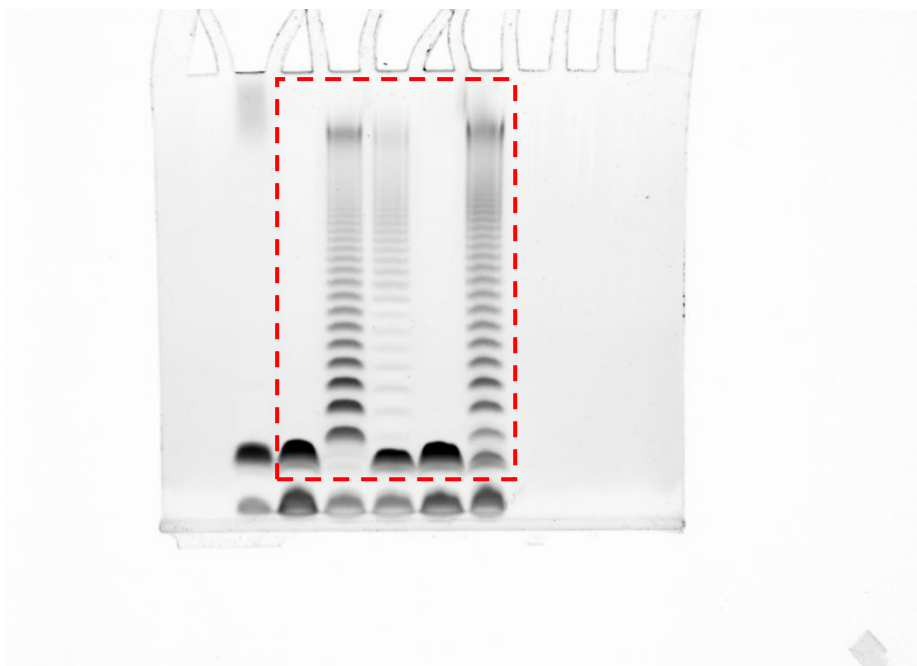

**Supplementary Figure 2c | Uncropped gels from Extended Data Fig. 7e**

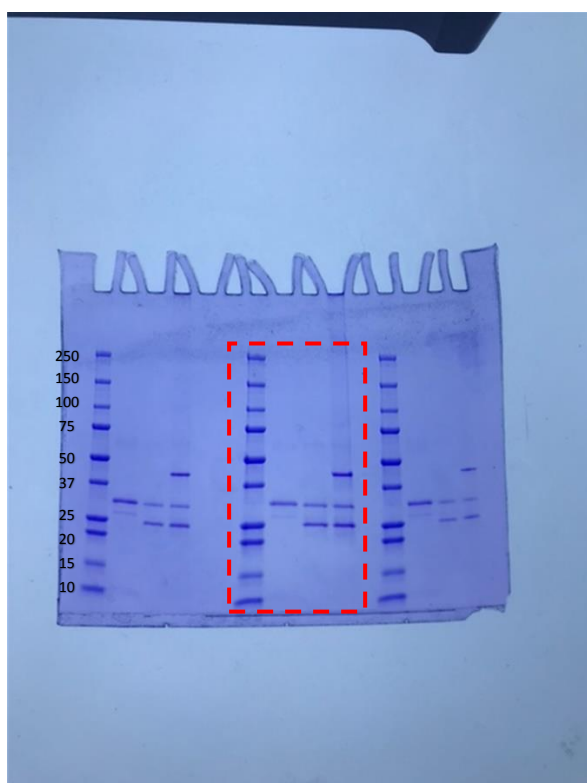

**Supplementary Figure 3a | Uncropped gel from Extended Data Fig. 1e**

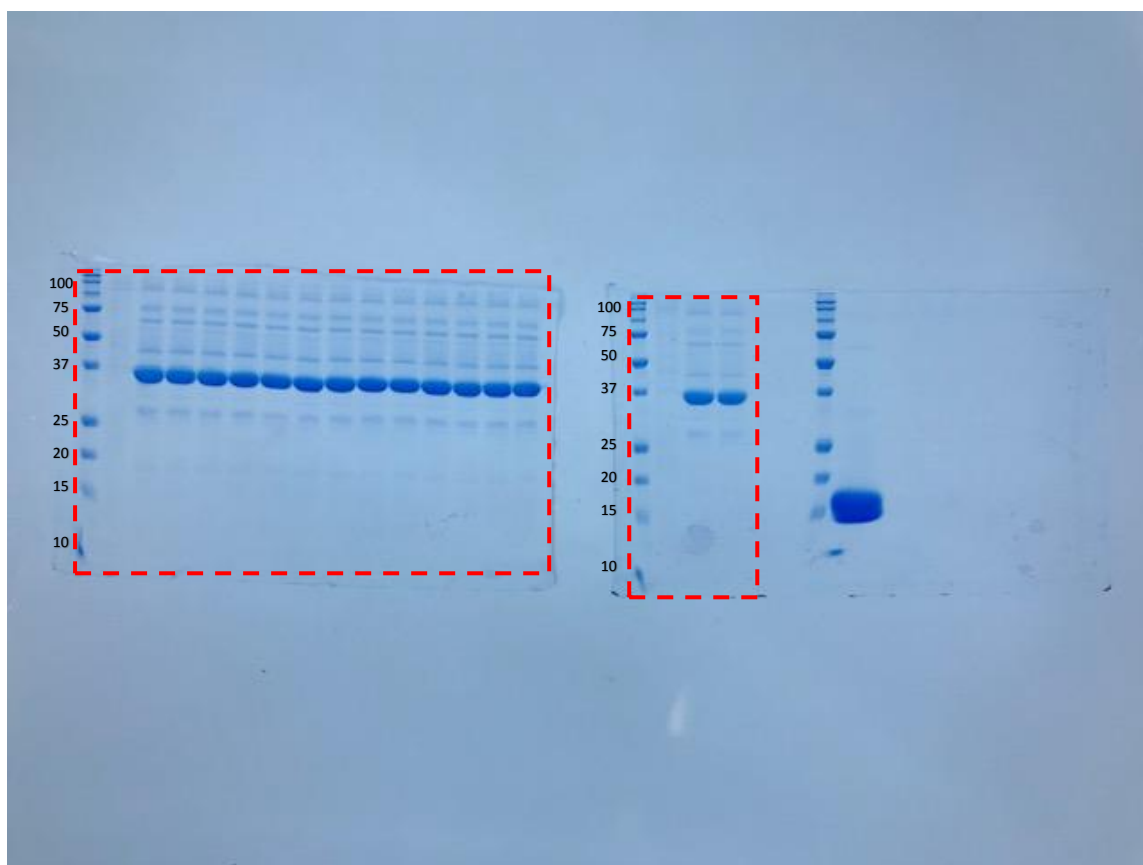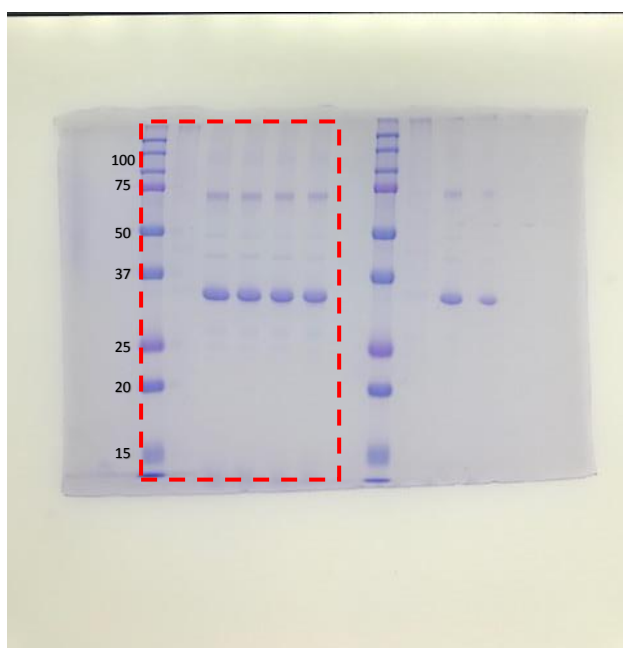

**Supplementary Figure 3b | Uncropped gel from Extended Data Fig. 7c**

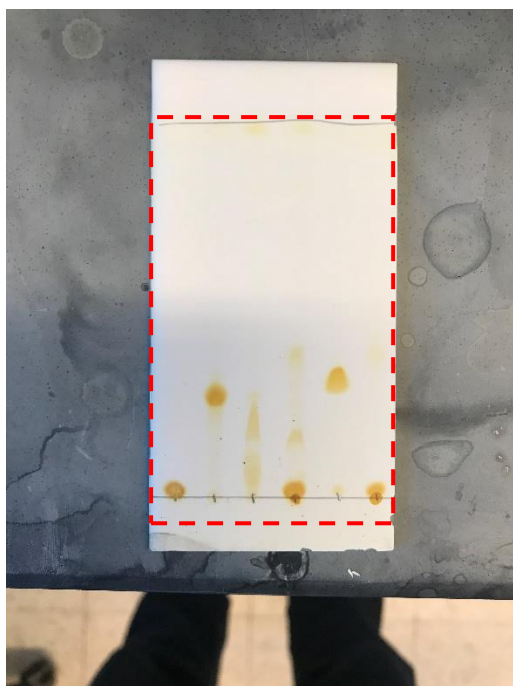

**Supplementary Figure 4a | Uncropped gel from Extended Data Fig. 5d**

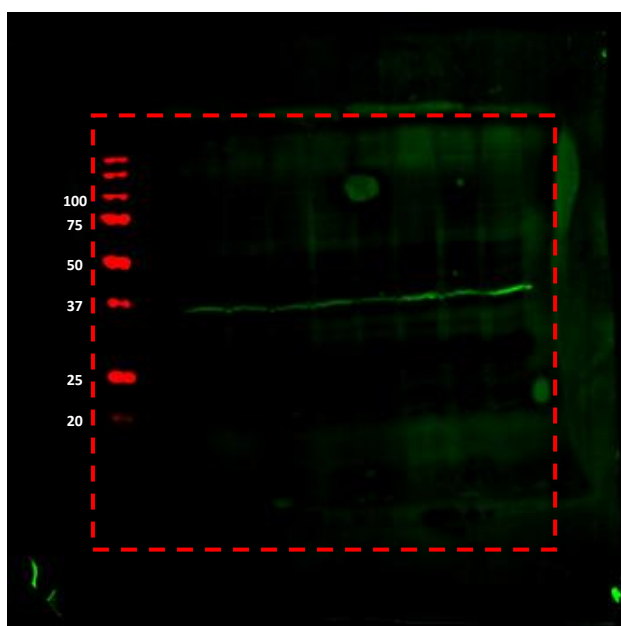

**Supplementary Figure 4b | Uncropped gel from Extended Data Fig. 7d**
