# Supplementary material
Source: PubMed Central journal article supplement (PMC9884178)
Supplement: NIHMS1849544-supplement-Supplementary_Tables.pdf [file NIHMS1849544-supplement-Supplementary_Tables.pdf]

|              | <b>target</b> | <b>empty nanodiscs</b> | <b>buffer</b> | <b>[Fab]</b>    |       |
|--------------|---------------|------------------------|---------------|-----------------|-------|
| <b>WaF10</b> | 0.909         | 0.088                  | 0.114         | <b>1.00E-06</b> | 0.573 |
| <b>WaE8</b>  | 1.078         | 0.091                  | 0.14          | <b>3.33E-07</b> | 0.496 |
| <b>WaB10</b> | 1.205         | 0.083                  | 0.12          | <b>1.11E-07</b> | 0.406 |
| <b>WaC9</b>  | 1.226         | 0.102                  | 0.119         | <b>3.70E-08</b> | 0.322 |
| <b>WaG11</b> | 1.061         | 0.082                  | 0.112         | <b>1.23E-08</b> | 0.255 |
| <b>WaC10</b> | 1.214         | 0.083                  | 0.103         | <b>4.12E-09</b> | 0.234 |
| <b>WaB12</b> | 0.913         | 0.269                  | 0.37          | <b>1.37E-09</b> | 0.147 |
|              |               |                        |               | <b>4.57E-10</b> | 0.105 |
|              |               |                        |               | <b>1.52E-10</b> | 0.079 |
|              |               |                        |               | <b>5.08E-11</b> | 0.064 |
|              |               |                        |               | <b>1.69E-11</b> | 0.068 |
|              |               |                        |               | <b>5.65E-12</b> | 0.065 |

| <b>WaF10</b> |       |       | <b>WaE8</b> |       |       | <b>WaB10</b> |
|--------------|-------|-------|-------------|-------|-------|--------------|
| 0.542        | 0.543 | 0.3   | 0.295       | 0.3   | 0.576 | 0.526        |
| 0.461        | 0.42  | 0.305 | 0.303       | 0.338 | 0.644 | 0.623        |
| 0.37         | 0.354 | 0.275 | 0.272       | 0.285 | 0.567 | 0.556        |
| 0.349        | 0.343 | 0.252 | 0.269       | 0.267 | 0.626 | 0.585        |
| 0.258        | 0.245 | 0.217 | 0.192       | 0.227 | 0.504 | 0.492        |
| 0.216        | 0.232 | 0.168 | 0.151       | 0.181 | 0.462 | 0.413        |
| 0.138        | 0.147 | 0.108 | 0.113       | 0.122 | 0.286 | 0.289        |
| 0.099        | 0.104 | 0.09  | 0.088       | 0.093 | 0.178 | 0.173        |
| 0.079        | 0.076 | 0.07  | 0.071       | 0.073 | 0.106 | 0.11         |
| 0.069        | 0.07  | 0.064 | 0.067       | 0.065 | 0.084 | 0.084        |
| 0.068        | 0.067 | 0.062 | 0.062       | 0.063 | 0.072 | 0.08         |
| 0.062        | 0.062 | 0.063 | 0.063       | 0.061 | 0.063 | 0.075        |

|       |       | <b>WaC9</b> |       |       | <b>WaG11</b> |       |
|-------|-------|-------------|-------|-------|--------------|-------|
| 0.496 | 0.587 | 0.59        | 0.596 | 0.467 | 0.462        | 0.468 |
| 0.605 | 0.548 | 0.566       | 0.56  | 0.457 | 0.456        | 0.467 |
| 0.528 | 0.458 | 0.483       | 0.478 | 0.518 | 0.45         | 0.421 |
| 0.568 | 0.432 | 0.448       | 0.446 | 0.439 | 0.42         | 0.407 |
| 0.521 | 0.361 | 0.374       | 0.368 | 0.349 | 0.343        | 0.308 |
| 0.433 | 0.333 | 0.333       | 0.343 | 0.329 | 0.299        | 0.302 |
| 0.268 | 0.225 | 0.226       | 0.226 | 0.186 | 0.193        | 0.196 |
| 0.162 | 0.148 | 0.154       | 0.159 | 0.13  | 0.128        | 0.125 |
| 0.103 | 0.099 | 0.101       | 0.097 | 0.089 | 0.092        | 0.087 |
| 0.081 | 0.074 | 0.078       | 0.077 | 0.069 | 0.074        | 0.073 |
| 0.069 | 0.069 | 0.069       | 0.069 | 0.068 | 0.07         | 0.069 |
| 0.063 | 0.063 | 0.062       | 0.062 | 0.06  | 0.064        | 0.062 |

|       | <b>WaC10</b> |       |       | <b>WaB12</b> |       |
|-------|--------------|-------|-------|--------------|-------|
| 0.48  | 0.456        | 0.443 | 0.607 | 0.561        | 0.592 |
| 0.579 | 0.536        | 0.536 | 0.49  | 0.462        | 0.539 |
| 0.494 | 0.476        | 0.459 | 0.385 | 0.329        | 0.408 |
| 0.53  | 0.464        | 0.454 | 0.304 | 0.281        | 0.329 |
| 0.39  | 0.368        | 0.357 | 0.206 | 0.193        | 0.231 |
| 0.296 | 0.294        | 0.305 | 0.149 | 0.145        | 0.169 |
| 0.181 | 0.188        | 0.184 | 0.108 | 0.099        | 0.107 |
| 0.129 | 0.12         | 0.129 | 0.084 | 0.079        | 0.081 |
| 0.087 | 0.086        | 0.087 | 0.074 | 0.075        | 0.071 |
| 0.069 | 0.069        | 0.072 | 0.068 | 0.072        | 0.071 |
| 0.064 | 0.064        | 0.065 | 0.067 | 0.067        | 0.065 |
| 0.064 | 0.06         | 0.061 | 0.064 | 0.064        | 0.063 |
